# Supplementary material for: A global catalogue of CO 2 emissions and co-emitted species from power plants at a very high spatial and temporal resolution
Source: Copernicus journal article supplement (doi:10.5194/essd-2023-95), 2023-04-11
Supplement: Supplementary file 1 [file essd-2023-95-supplement.pdf]

# A global catalogue of CO<sub>2</sub> emissions and co-emitted species from power plants at a very high spatial and temporal resolution

Marc Guevara<sup>1</sup>, Santiago Enciso<sup>1,a</sup>, Carles Tena<sup>1</sup>, Oriol Jorba<sup>1</sup>, Stijn Dellaert<sup>2</sup>, Hugo Denier van der Gon<sup>2</sup>, Carlos Pérez García-Pando<sup>1,3</sup>

- 5 <sup>1</sup> Barcelona Supercomputing Center, Barcelona, Spain  
<sup>2</sup> TNO, Department of Climate, Air and Sustainability, Utrecht, the Netherland  
<sup>3</sup> ICREA, Catalan Institution for Research and Advanced Studies, Barcelona, Spain  
<sup>a</sup> now at: Applus IDIADA Group, Tarragona, Spain

## 10 Supplementary material

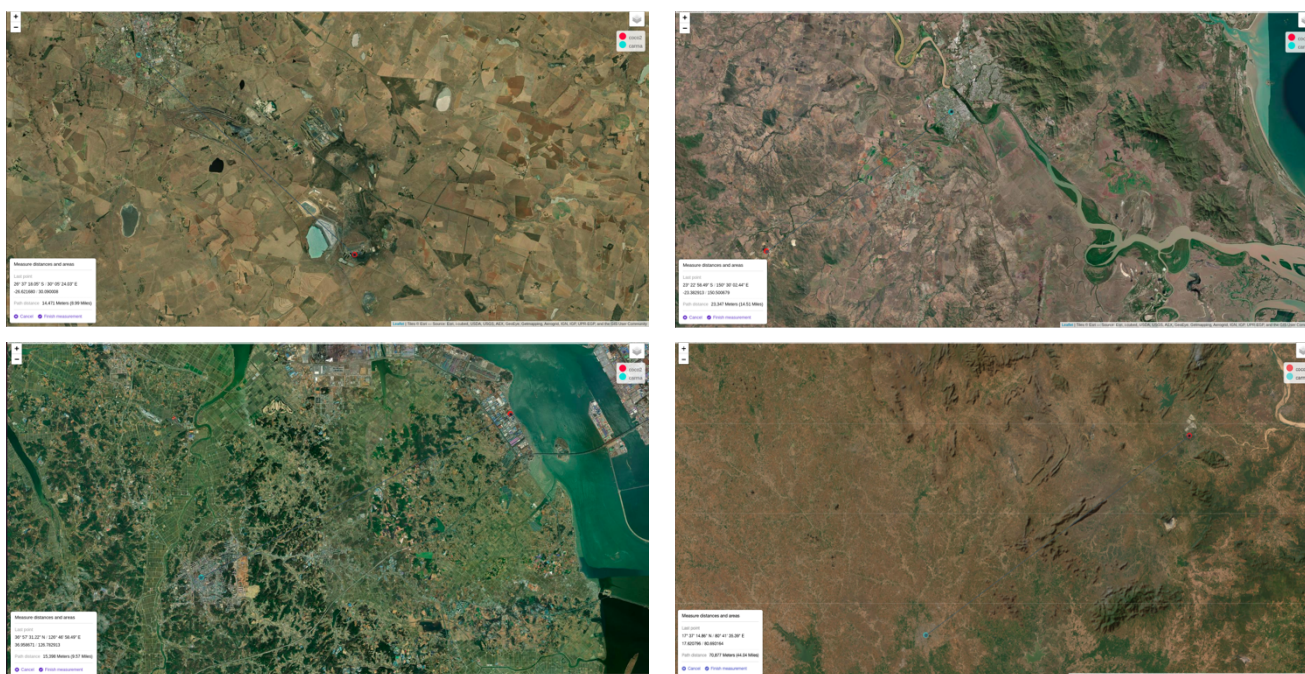

Figure S1. Comparison between the geographical location reported by the present catalogue (red points) and CARMAv3 (blue points) for selected power plants, including Camden (South Africa), Stanwell (Australia), Dangjin (South Korea) and Kothagudem (India). The windows on the low left corner indicates the distance (m) between geographical locations for each cases. Tiles © Esri — Source: Esri, i-cubed, USDA, USGS, AEX, GeoEye, Getmapping, Aerogrid, IGN, IGP, UPR-EGP, and the GIS User Community.

15

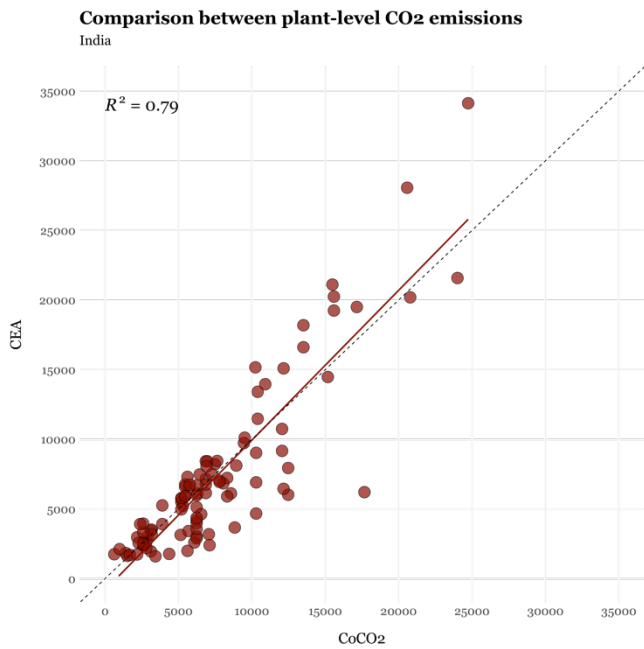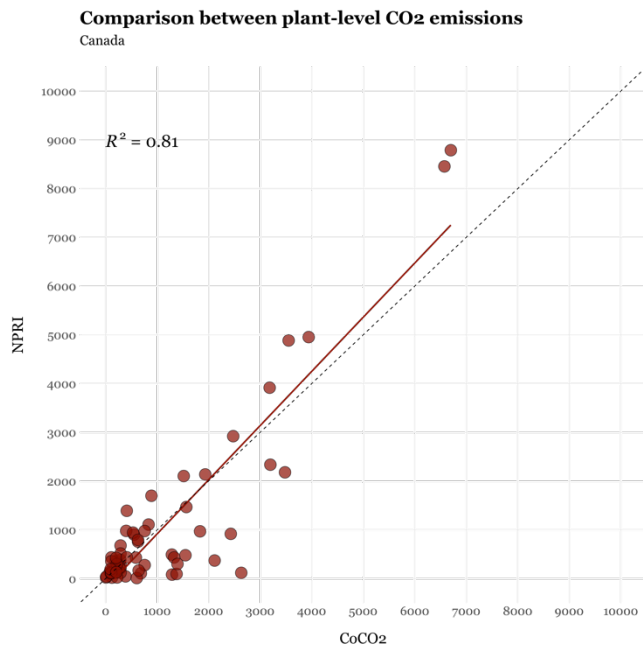

**Figure S2. Plant-to-plant CO<sub>2</sub> annual emission comparison between top 100 emitters reported by this work and CEA for India and NPRI for Canada, respectively (dashed line represents the 1:1 line).**
